# Supplementary material
Source: PubMed Central journal article supplement (PMC4159306)
Supplement: NIHMS621882-supplement-Supporting_Information.pdf [file NIHMS621882-supplement-Supporting_Information.pdf]

**Supplementary Table 1**

**A) Quantitative Proteomics for protein analysis**

| <b>Global/<br/>Targeted</b> | <b>Labeling/label-free</b> | <b>Quantification method</b> | <b>References</b>                              |
|-----------------------------|----------------------------|------------------------------|------------------------------------------------|
| Global Proteomics           | Label-free                 | Ion current(IC)              | [29] [74] [109] [107] [108]                    |
|                             |                            | Spectral Counts(SpC)         | [67] [72] [79, 88]<br>[86] [110]               |
|                             | Labeling                   | iTRAQ                        | [58, 78, 80] [59] [69]<br>[71] [89] [111, 113] |
|                             |                            | SILAC                        | [73]                                           |
|                             |                            | ICPL                         | [11]                                           |
|                             |                            | <sup>18</sup> O              | [82]                                           |
|                             |                            | Dimethyl labeling            | [95]                                           |
| Targeted<br>Proteomics      | SRM                        |                              | [140] [135] [142] [144]                        |
|                             | Top-down MS                |                              | [121] [122]                                    |

**B) PTM Quantification**

| <b>Global/<br/>Targeted</b> | <b>Labeling/label-free</b> | <b>Quantification method</b> | <b>References</b>      |
|-----------------------------|----------------------------|------------------------------|------------------------|
| Global<br>Proteomics        | Label-free                 | Ion-current(IC)              | [96, 99]               |
|                             | Labeling                   | TMT                          | [97]                   |
|                             |                            | iTRAQ                        | [93, 94]               |
|                             |                            | Dimethyl labeling            | [95]                   |
| Targeted<br>Proteomics      | SRM                        |                              | [145] [146, 147] [148] |
|                             | Top-down                   |                              | [119, 120]             |
